# Supplementary material for: Computed Tomography Lung Density Analysis: An Imaging Biomarker Predicting Physical Inactivity in Chronic Obstructive Pulmonary Disease: A Pilot Study
Source: MDPI journal article supplement (doi:10.3390/jcm12082959), 2023-04-19
Supplement: s1 [file s1]

**Table S1.** Clinical characteristics of healthy subjects and COPD patients with mMRC grade $\geq$ 2.

|                                | HS (n = 12)      | COPD with<br>mMRC grade $\geq$ 2<br>(n = 8) | P-value |
|--------------------------------|------------------|---------------------------------------------|---------|
| Sex (M/F)                      | 6/6              | 8/0                                         | 0.04    |
| Age (year)                     | 62 (56–70)       | 66 (64–75)                                  | 0.18    |
| BMI (kg/m <sup>2</sup> )       | 21.4 (19.8–23.8) | 19.9 (19.4–22.5)                            | 0.57    |
| Smoking index (pack-year)      | 10 (0.0–31)      | 43 (37–71)                                  | 0.008   |
| CAT                            | 4 (3.5–6.3)      | 13.5 (9.5–22.0)                             | 0.002   |
| mMRC Dyspnea Scale (0/1/2/3/4) | 6/6/0/0/0        | 0/0/5/3/0                                   | <0.0001 |
| FEV <sub>1</sub> (L)           | 2.65 (2.39–3.16) | 1.52 (1.16–2.08)                            | 0.001   |
| FEV <sub>1</sub> /FVC (%)      | 78.2 (75.8–86.9) | 54.3 (47.7–64.6)                            | 0.001   |
| FEV <sub>1</sub> % pred (%)    | 110 (103–115)    | 52.3 (47.1–70.5)                            | <0.0001 |
| GOLD stage (1/2/3/4)           | -                | 1/5/2/0                                     | -       |
| FVC % pred (%)                 | 110 (105–120)    | 88.5 (74.4–105)                             | 0.05    |
| RV % pred (%)                  | 114 (103–117)    | 132 (99.2–155)                              | 0.44    |
| RV/TLC % pred (%)              | 100 (90.7–113)   | 104 (90.3–118)                              | 0.83    |
| IC/TLC (%)                     | 44.4 (42.5–49.6) | 33.7 (31.4–38.6)                            | 0.02    |
| %DLco (%)                      | 105 (96.8–125)   | 77.9 (65.8–90.6)                            | 0.03    |
| %DLco/VA (%)                   | 94.6 (89.9–105)  | 63.5 (52.4–86.0)                            | 0.07    |

Data are presented as medians (interquartile ranges). Definition of abbreviations: HS, healthy subjects; COPD, chronic obstructive pulmonary disease; BMI, body mass index; CAT, COPD Assessment Test; mMRC, modified Medical Research Council; GOLD, Global Initiative for Chronic Obstructive Lung Disease; FEV<sub>1</sub>, forced expiratory volume in 1 s; FVC, forced vital capacity; RV, residual volume; TLC, total lung capacity; IC, inspiratory capacity; DLCO, carbon monoxide diffusing capacity; VA, alveolar volume.
